# Supplementary material for: Evaluation of Organo [18F]Fluorosilicon Tetrazine as a Prosthetic Group for the Synthesis of PET Radiotracers
Source: PubMed Central journal article supplement (PMC7179430; doi:10.3390/molecules25051208), 2020-03-07
Supplement: molecules-25-01208-s001.pdf [file molecules-25-01208-s001.pdf]

SUPPLEMENTARY DATA

# Evaluation of Organo[<sup>18</sup>F]fluorosilicon Tetrazine as a Prosthetic Group for Synthesis of PET Radiotracers

*Sofia Otaru<sup>†</sup>, Surachet Imlimthan<sup>†</sup>, Mirkka Sarparanta<sup>†</sup>,*

*Kerttuli Helariutta<sup>†</sup>, Kristiina Wähälä<sup>†,§</sup>, Anu J. Airaksinen<sup>†,□,\*</sup>*

<sup>†</sup>Department of Chemistry, Radiochemistry, University of Helsinki, Finland

<sup>§</sup>Department of Biochemistry and Developmental Biology, Faculty of Medicine, University of Helsinki, Finland

<sup>□</sup>Present address: Turku PET Centre, Department of Chemistry, University of Turku, Finland

\*Corresponding author: Anu J. Airaksinen

Department of Chemistry, Radiochemistry, P.O. Box 55, FI-00014 University of Helsinki, Finland.  
E-mail: [anu.airaksinen@helsinki.fi](mailto:anu.airaksinen@helsinki.fi). Present address: Turku PET Centre, University of Turku,  
Kiinamylynkatu 4-8, FI-20520 Turku

## Table of contents

|                                                                                                                                 |           |
|---------------------------------------------------------------------------------------------------------------------------------|-----------|
| <b>Figure S1</b> <sup>1</sup> H-NMR of compound 3 .....                                                                         | <b>1</b>  |
| <b>Figure S2</b> <sup>13</sup> C-NMR of compound 3 .....                                                                        | <b>2</b>  |
| <b>Figure S3</b> <sup>1</sup> H-NMR of SiFA-Tz (6) .....                                                                        | <b>3</b>  |
| <b>Figure S4</b> <sup>19</sup> F-NMR of SiFA-Tz (6) .....                                                                       | <b>4</b>  |
| <b>Figure S5</b> <sup>13</sup> C-NMR of SiFA-Tz (6) .....                                                                       | <b>5</b>  |
| <b>Figure S6</b> HPLC of [ <sup>18</sup> F]SiFA ([ <sup>18</sup> F]5) .....                                                     | <b>6</b>  |
| <b>Figure S7</b> HPLC of oxime formation (two-step method) for [ <sup>18</sup> F]SiFA-Tz ([ <sup>18</sup> F]6) (crude).....     | <b>7</b>  |
| <b>Figure S8</b> HPLC (radio- and PDA -detectors) of formulated [ <sup>18</sup> F]SiFA-Tz ([ <sup>18</sup> F]6) .....           | <b>8</b>  |
| <b>Figure S9</b> Autoradiography TLC-profile of purified [ <sup>18</sup> F]SiFA-Tz ([ <sup>18</sup> F]6).....                   | <b>9</b>  |
| <b>Figure S10</b> HPLC of [ <sup>18</sup> F]SiFA-Tz ([ <sup>18</sup> F]6) stability in 1xPBS (90 min) .....                     | <b>10</b> |
| <b>Figure S11</b> HPLC of purified [ <sup>18</sup> F]fluoroalbumin ([ <sup>18</sup> F]10).....                                  | <b>11</b> |
| <b>Figure S12</b> Autoradiography TLC-profile of purified [ <sup>18</sup> F]fluoroalbumin ([ <sup>18</sup> F]10) .....          | <b>11</b> |
| <b>Figure S13</b> Biodistribution of [ <sup>18</sup> F]SiFA-Tz ([ <sup>18</sup> F]6).....                                       | <b>12</b> |
| <b>Figure S14</b> Biodistribution of [ <sup>18</sup> F]fluoroalbumin ([ <sup>18</sup> F]10) .....                               | <b>13</b> |
| <b>Figure S15</b> Radio-TLC profile of [ <sup>18</sup> F]SiFA-Tz ([ <sup>18</sup> F]6) in human plasma stability studies .....  | <b>14</b> |
| <b>Figure S16</b> Radio-HPLC profile of [ <sup>18</sup> F]SiFA-Tz ([ <sup>18</sup> F]6) in human plasma stability studies ..... | <b>14</b> |
| <b>Figure S17</b> Radio-HPLC profile of [ <sup>18</sup> F]SiFA-Tz ([ <sup>18</sup> F]6) metabolites found in blood .....        | <b>15</b> |

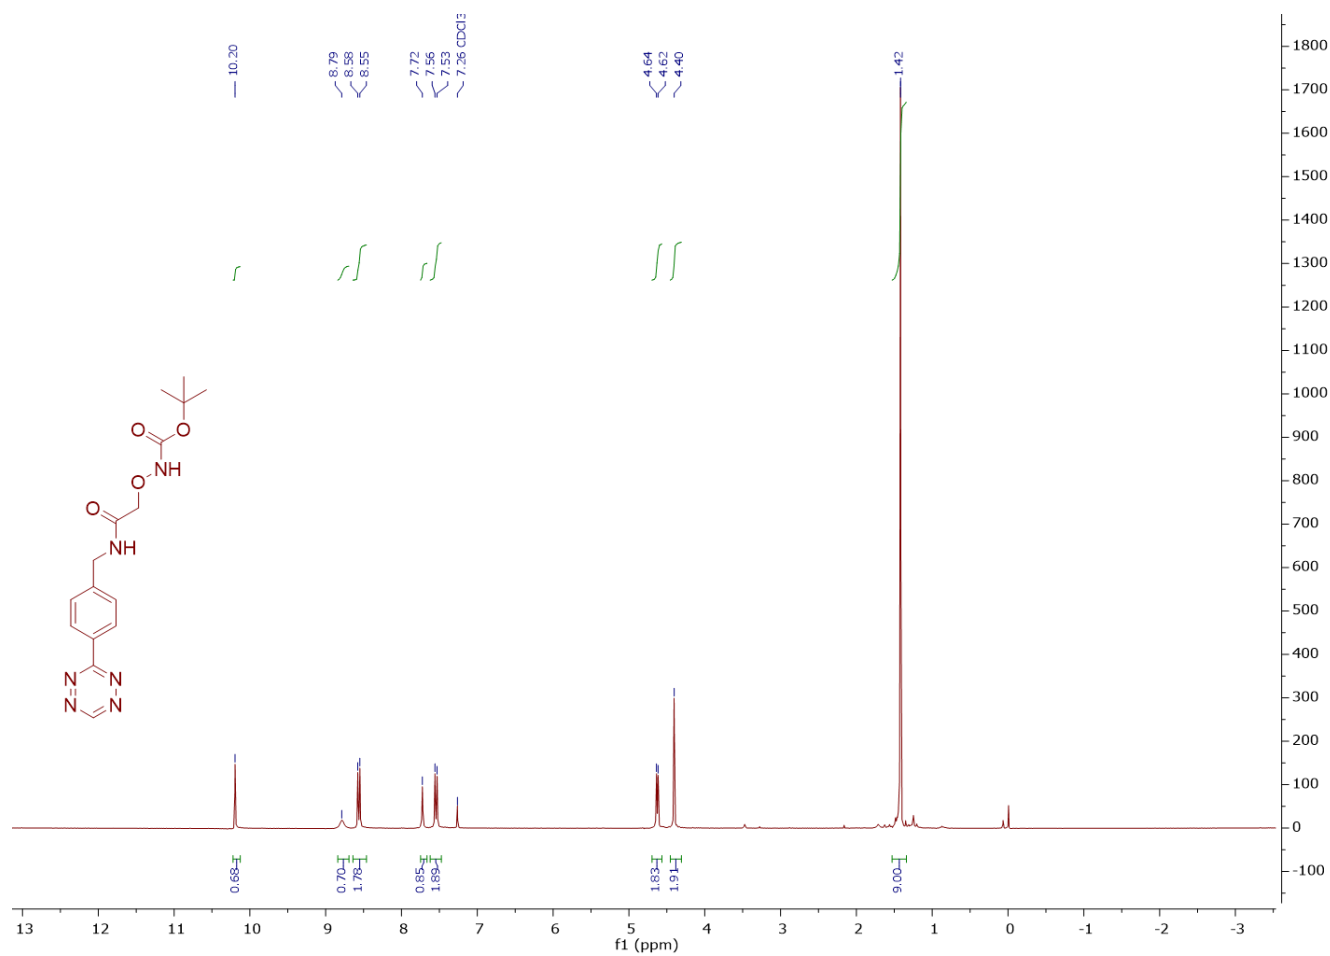

**Figure S1.**  $^1\text{H-NMR}$  (300 MHz,  $\text{CDCl}_3$ ) of compound **3**.

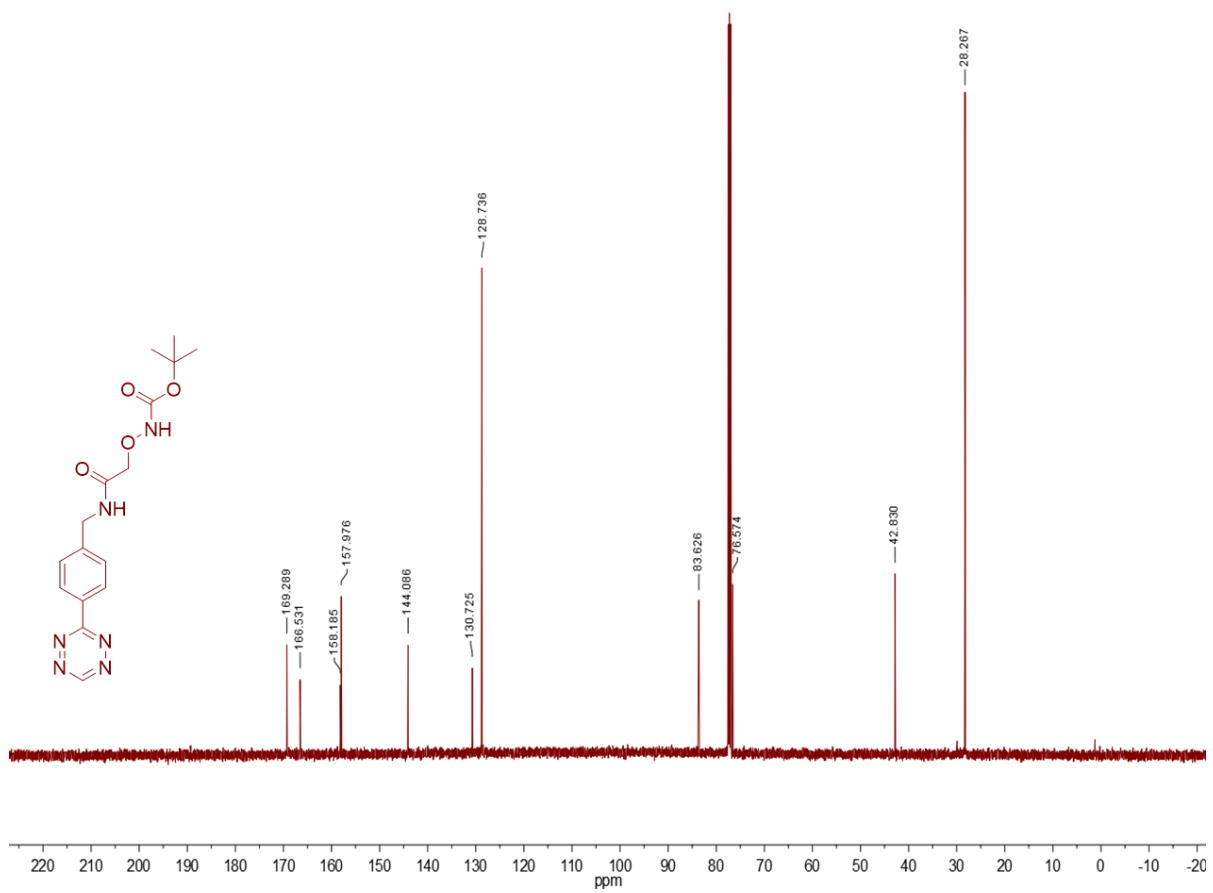

**Figure S2.** <sup>13</sup>C-NMR (75 MHz, CDCl<sub>3</sub>) of compound **3**.

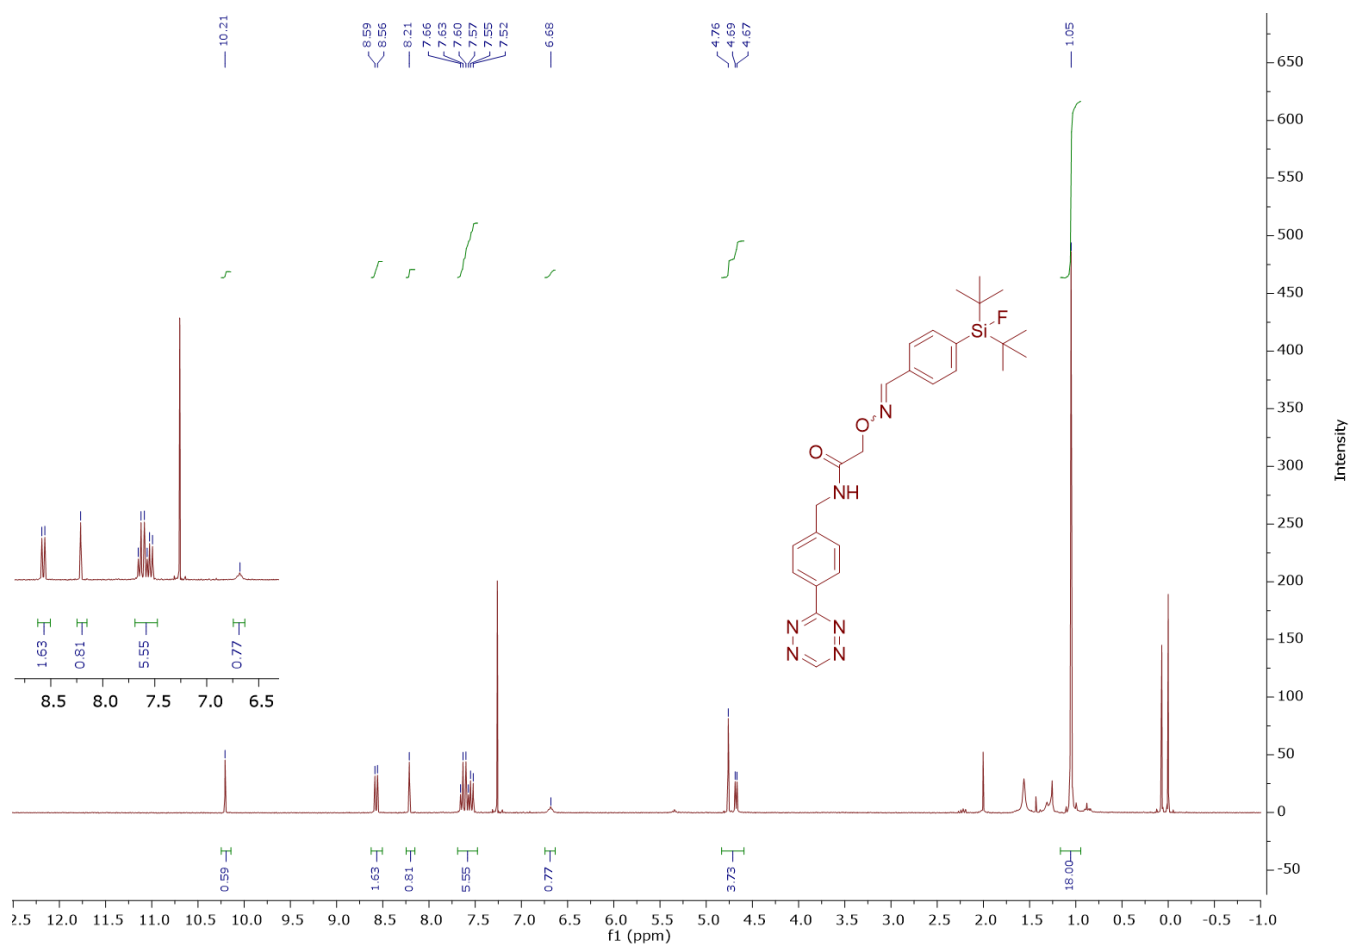

**Figure S3.**  $^1\text{H-NMR}$  (500 MHz,  $\text{CDCl}_3$ ) of SiFA-Tz (6).

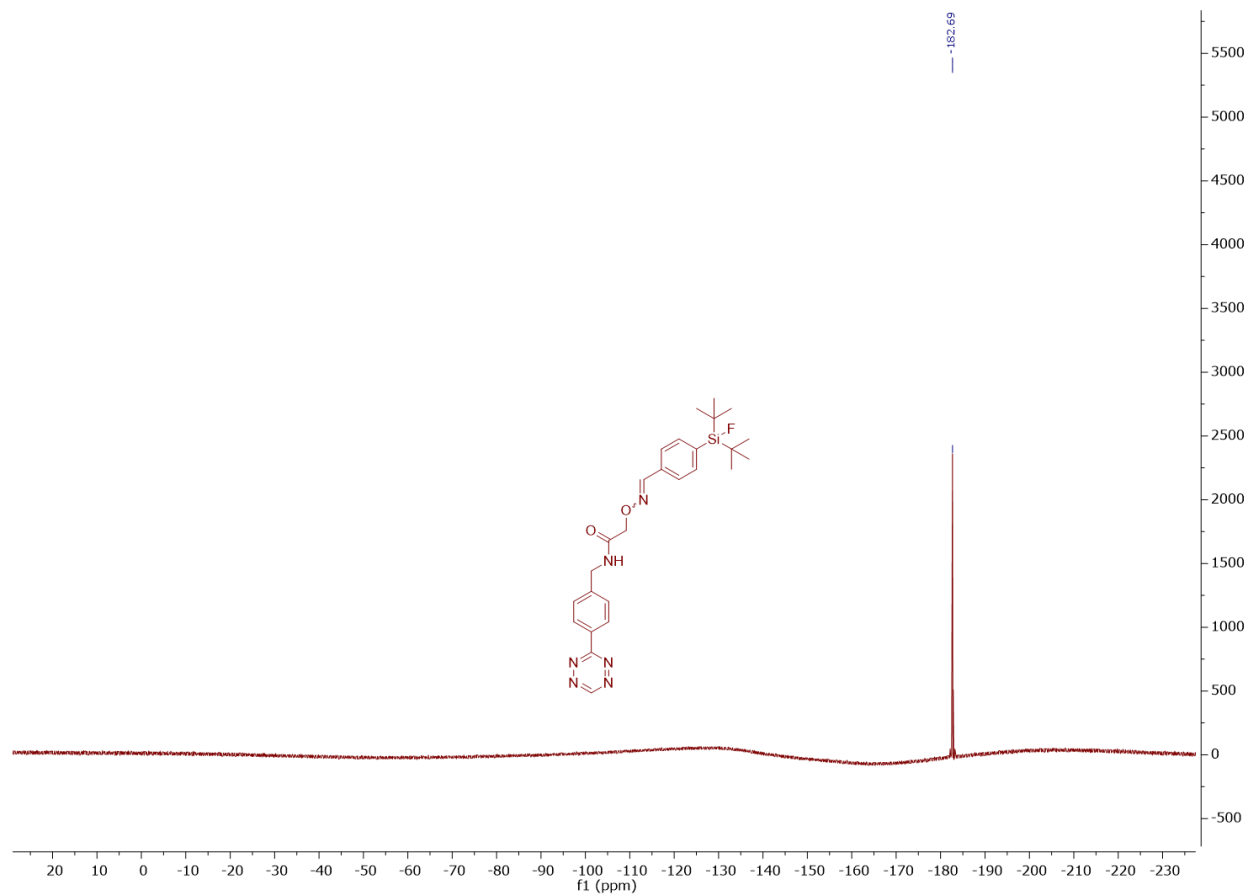

**Figure S4.**  $^{19}\text{F}$ -NMR (282 MHz,  $\text{CDCl}_3$ ) of SiFA-Tz (**6**).



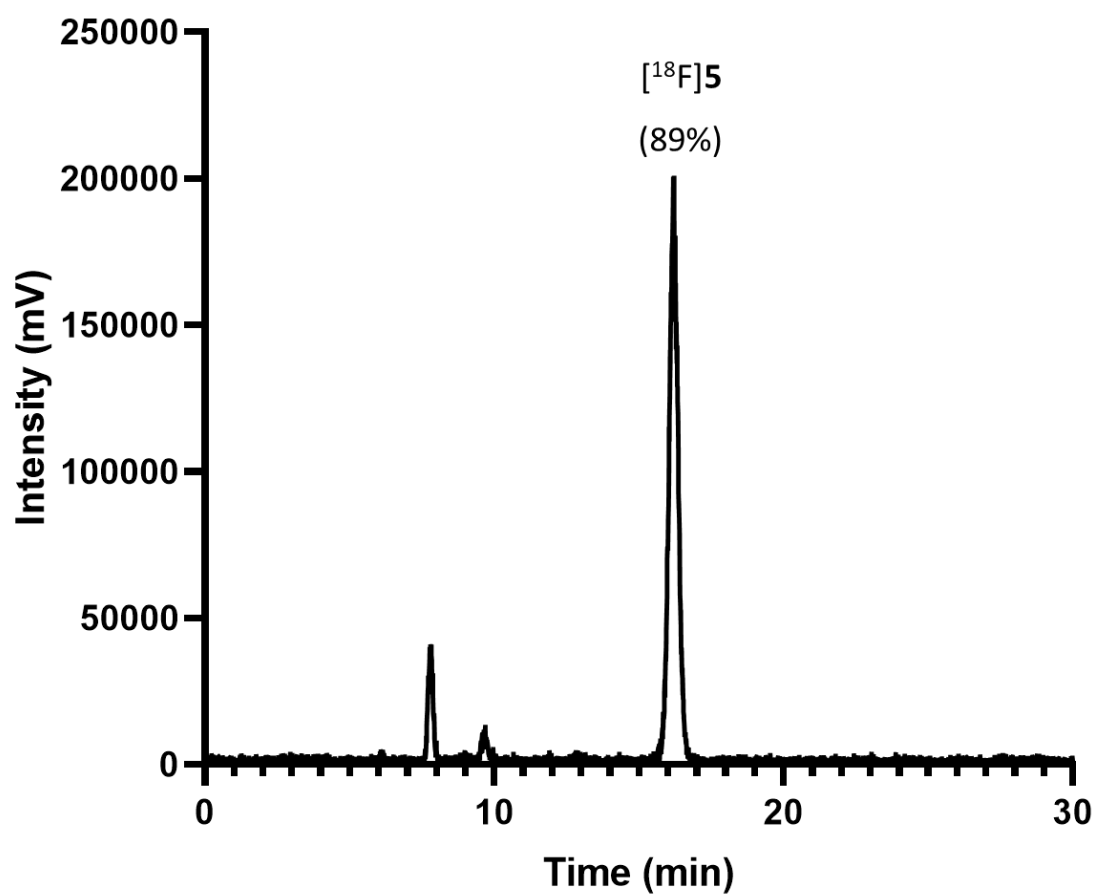

**Figure S6.** Radio-HPLC chromatogram of crude  $[^{18}\text{F}]$ SiFA ( $[^{18}\text{F}]5$ ) (Radiodetector).



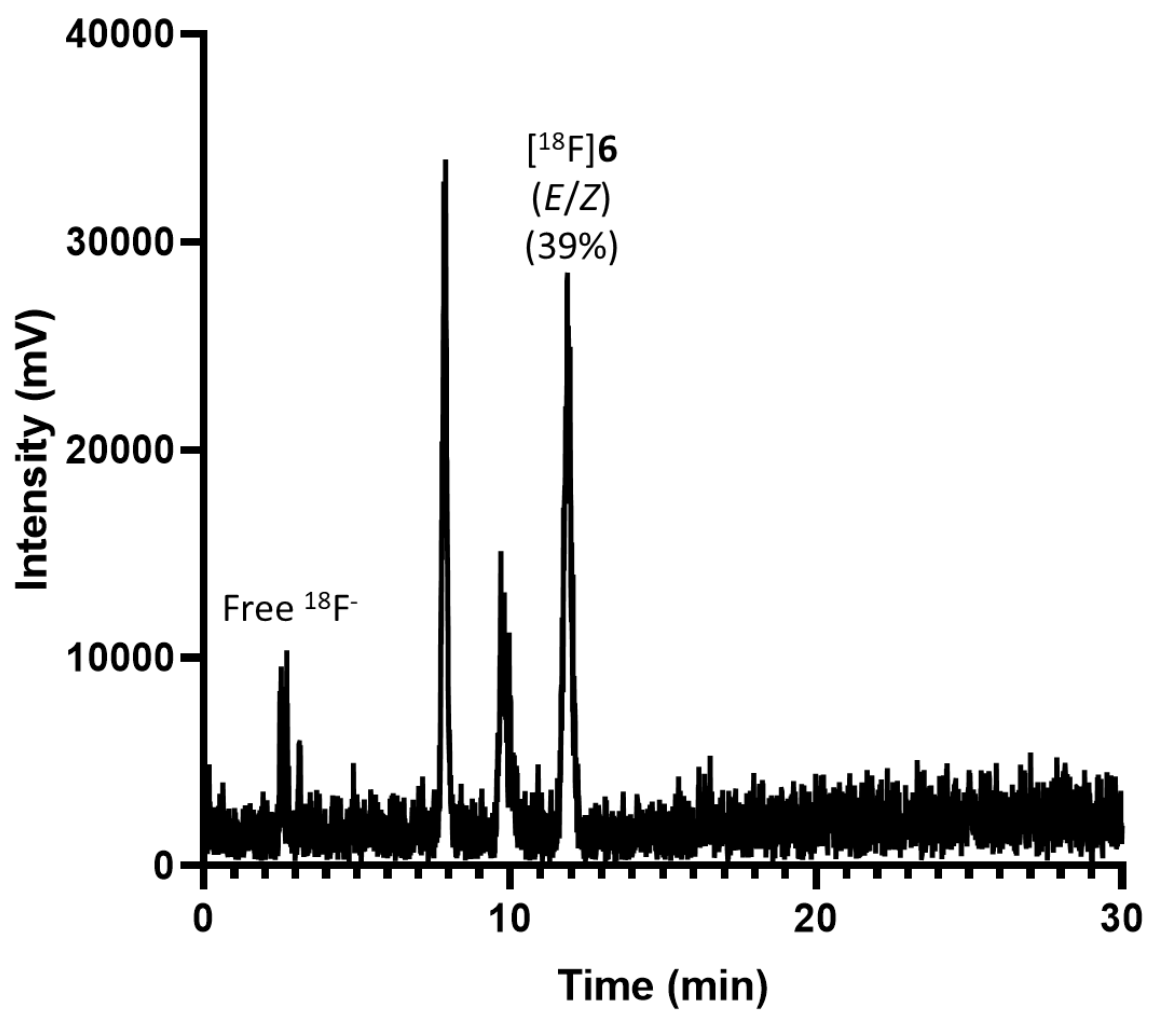

**Figure S7.** Radio-HPLC chromatogram of oxime formation (two-step method) for  $[^{18}\text{F}]\text{SiFA-Tz}$  ( $[^{18}\text{F}]\mathbf{6}$ ) crude (radiodetector).

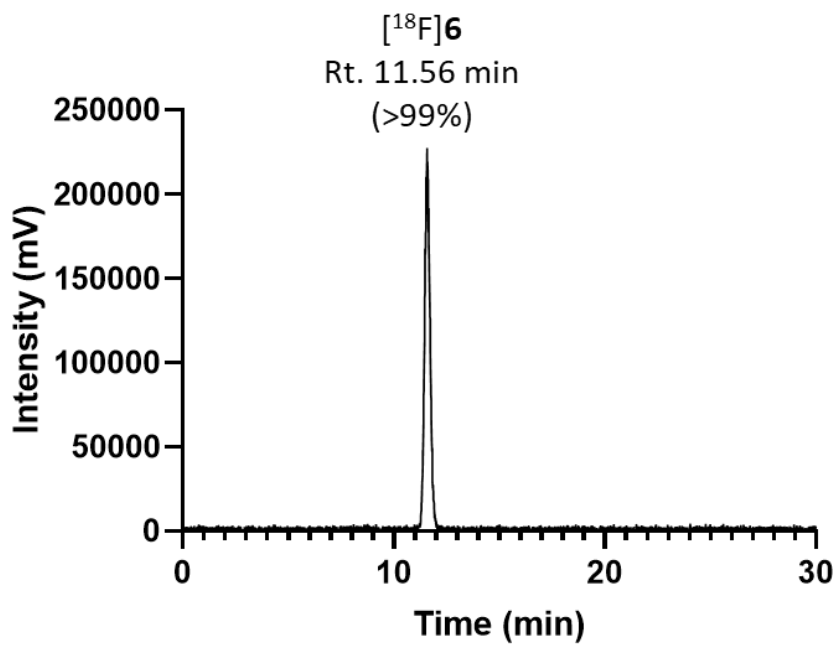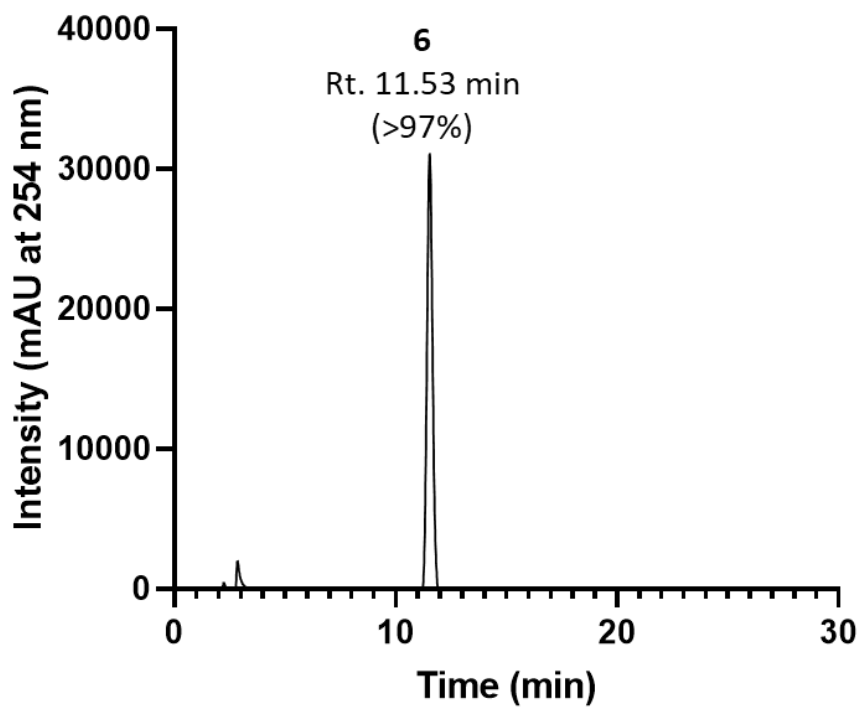

**Figure S8.** HPLC chromatograms of formulated [<sup>18</sup>F]SiFA-Tz ([<sup>18</sup>F]6) analyzed by radiodetector (top) and PDA -detector (bottom).

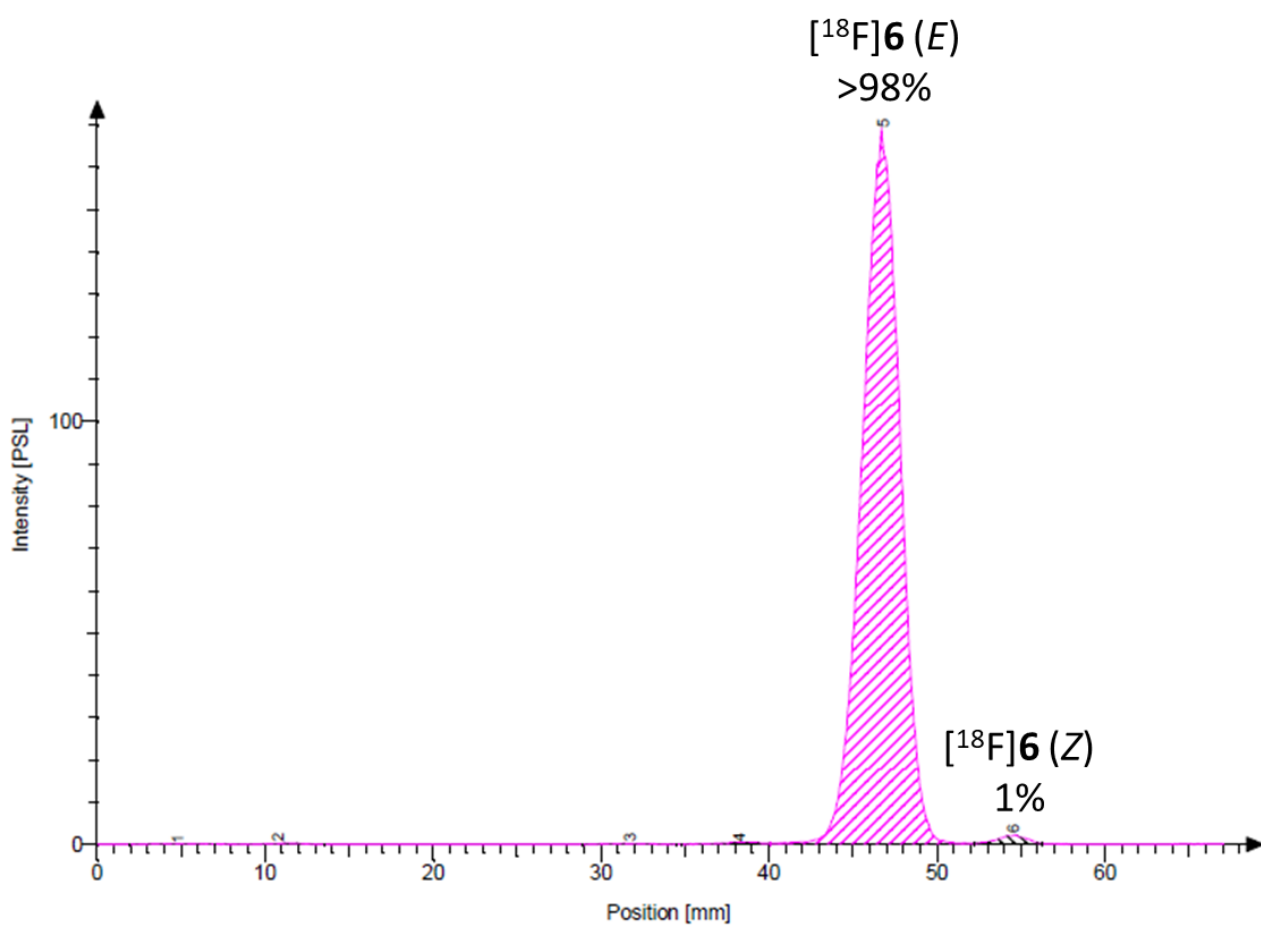

**Figure S9.** Radio-TLC chromatogram (digital autoradiography) of [18F]SiFA-Tz ([18F]6).

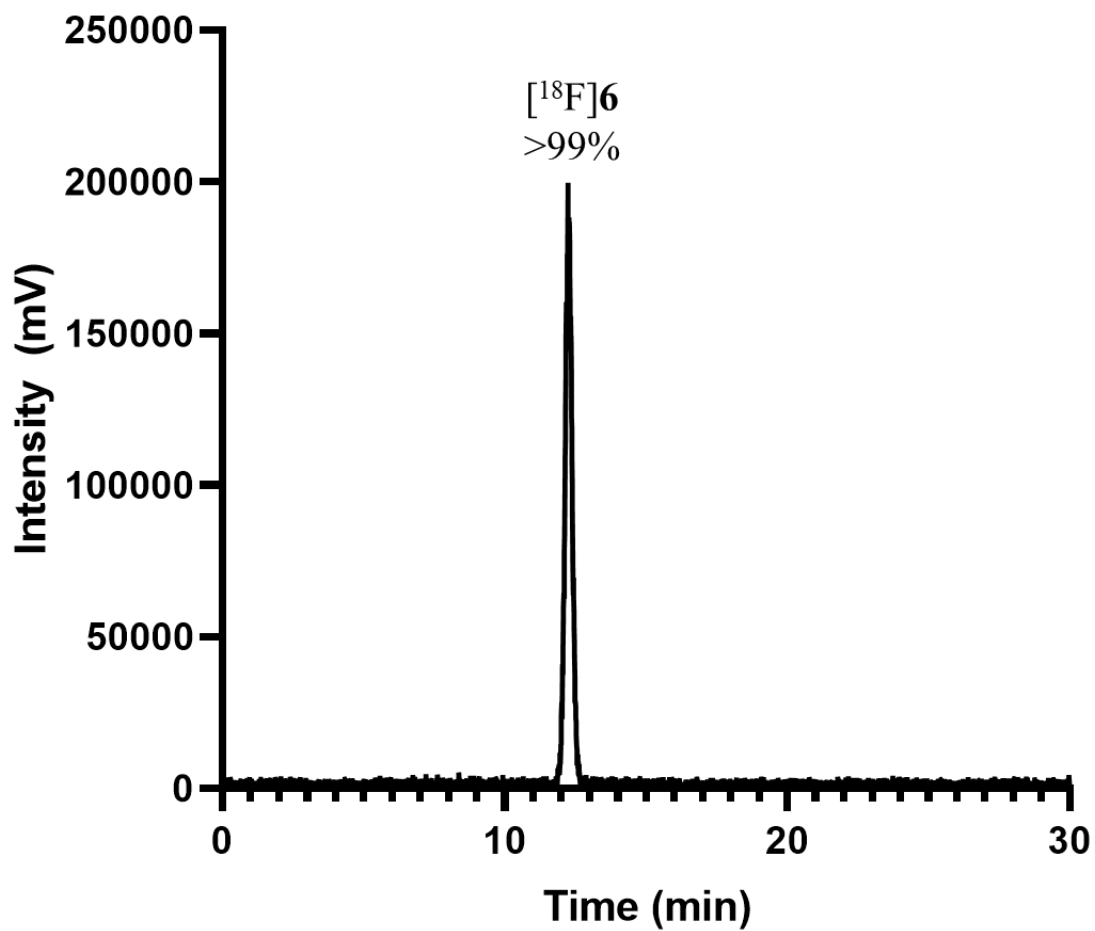

**Figure S10.** Radio-HPLC chromatogram of [<sup>18</sup>F]SiFA-Tz ([<sup>18</sup>F]6) stability at 90 minutes in 1×PBS (radiodetector).

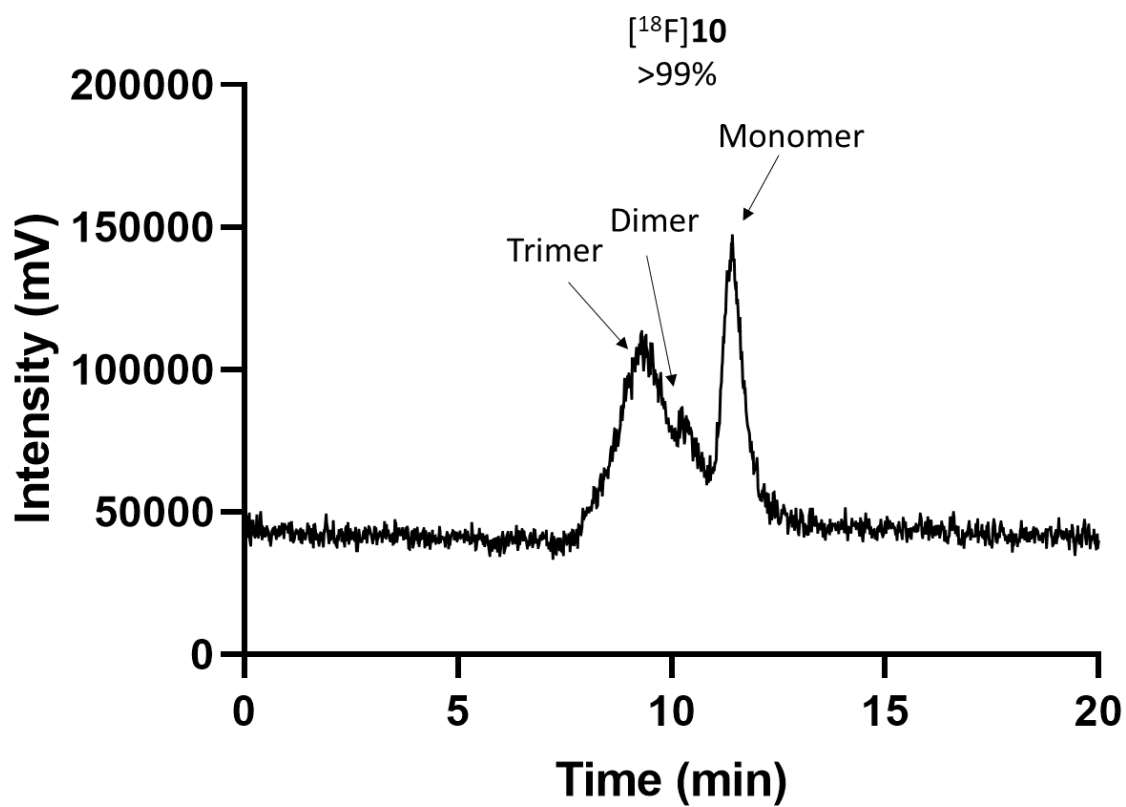

**Figure S11.** Radio-HPLC chromatogram of [ $^{18}\text{F}$ ]fluoroalbumin ([ $^{18}\text{F}$ ]10) (radiodetector).

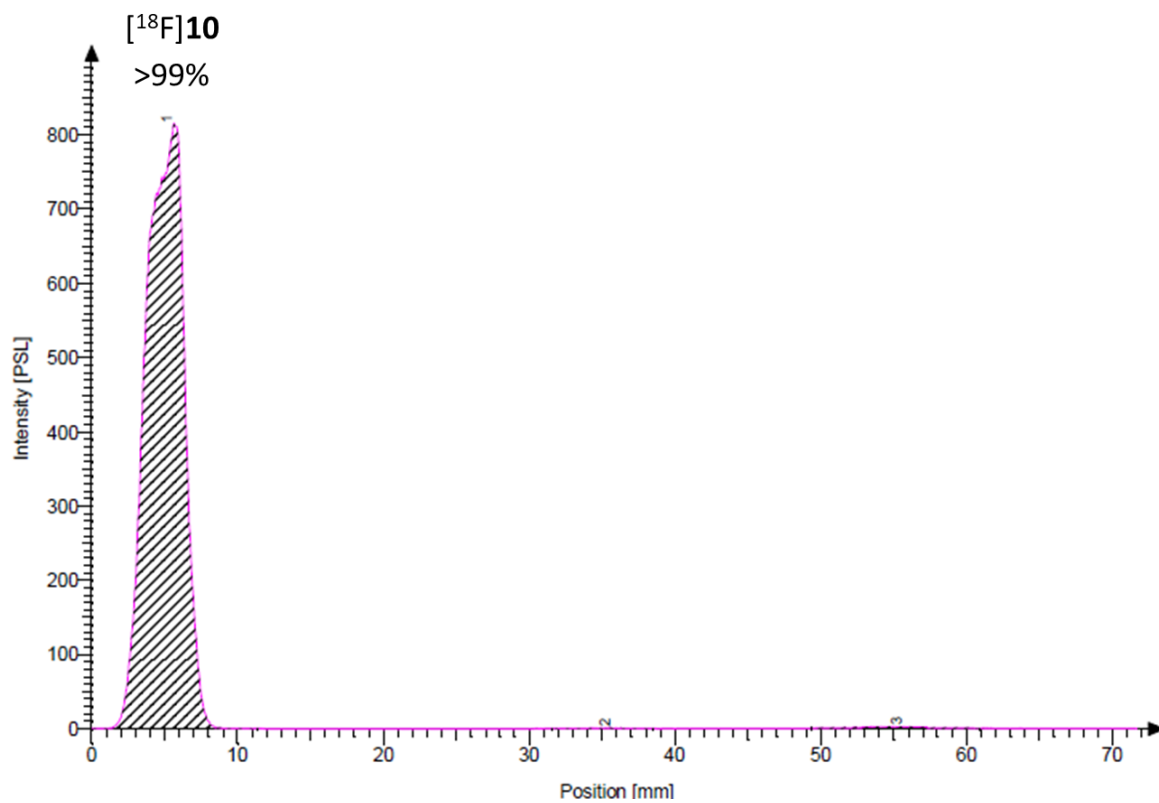

**Figure S12.** Radio-TLC chromatogram (digital autoradiography) of [ $^{18}\text{F}$ ]fluoroalbumin ([ $^{18}\text{F}$ ]10).

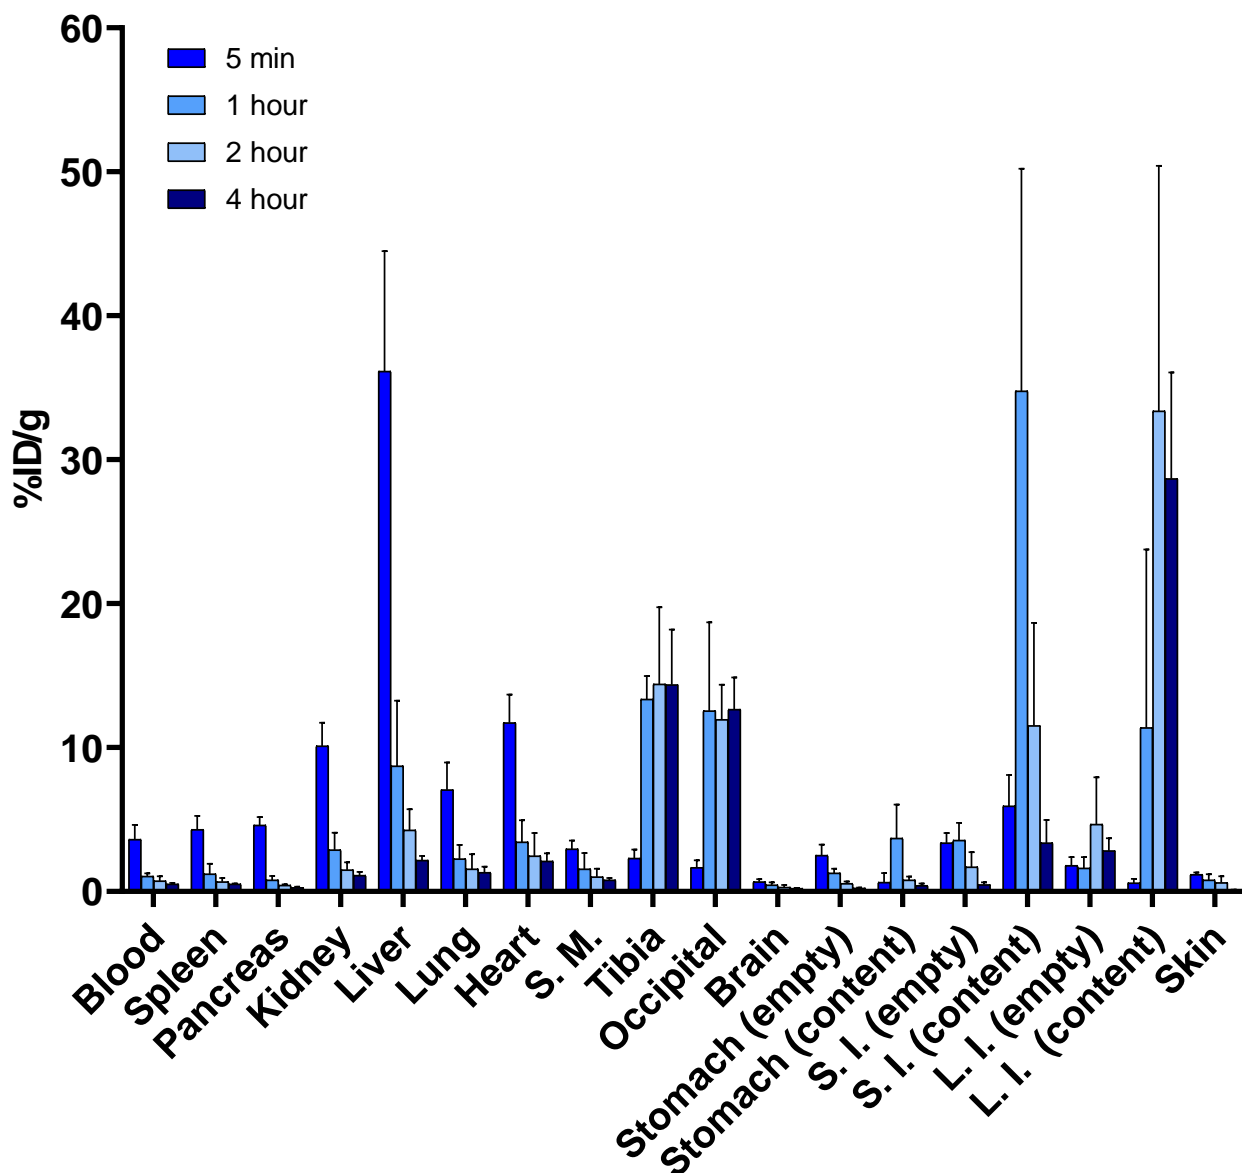

**Figure S13.** Biodistribution of radioactivity after intravenous administration of [ $^{18}\text{F}$ ]SiFA-Tz ([ $^{18}\text{F}$ ]6) demonstrating fast clearance from circulation, hepatobiliary excretion and high bone uptake at 60 minutes post-injection.

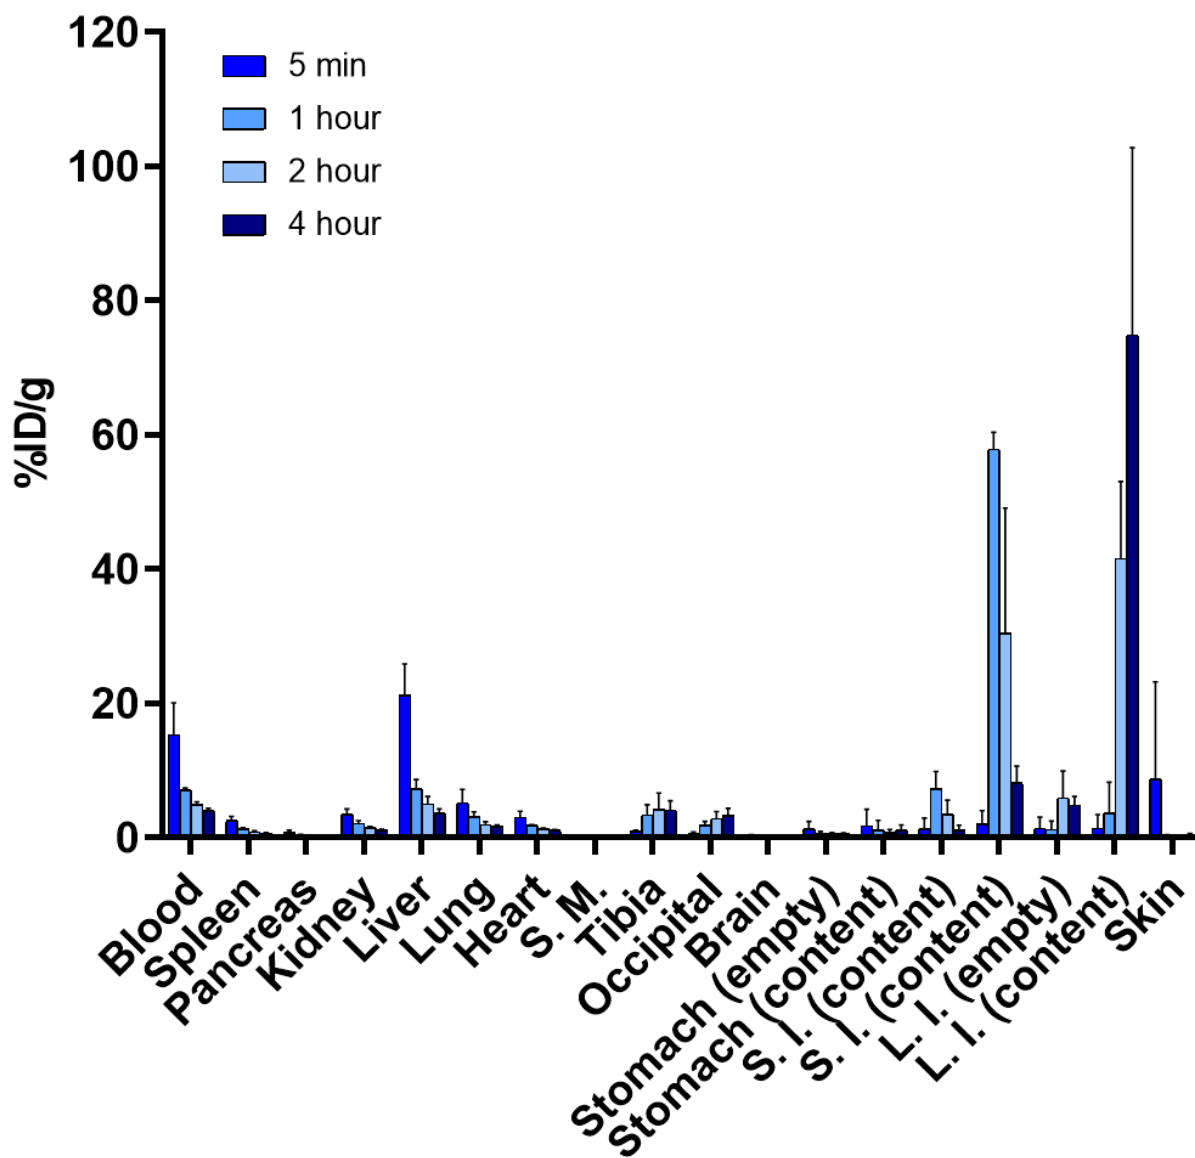

**Figure S14.** Biodistribution of radioactivity after intravenous administration of [ $^{18}\text{F}$ ]fluoroalbumin ( $^{18}\text{F}$ 10) demonstrating prolonged residence time in circulation.

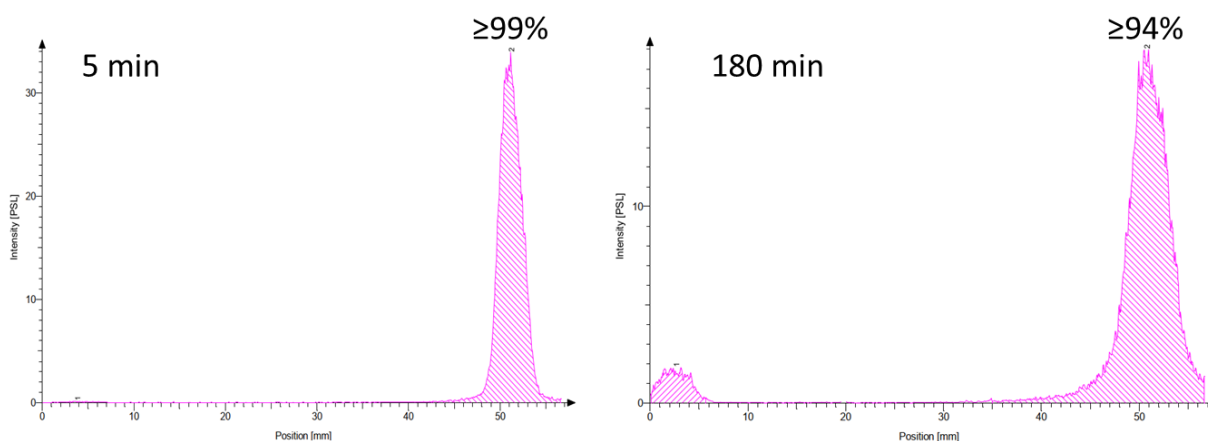

**Figure S15.** Radio-TLC (digital autoradiography) chromatograms of  $[^{18}\text{F}]\text{SiFA-Tz}$  ( $[^{18}\text{F}]\mathbf{6}$ ) in human plasma stability studies show minor defluorination of the radiotracer at 180 minutes after start of incubation.

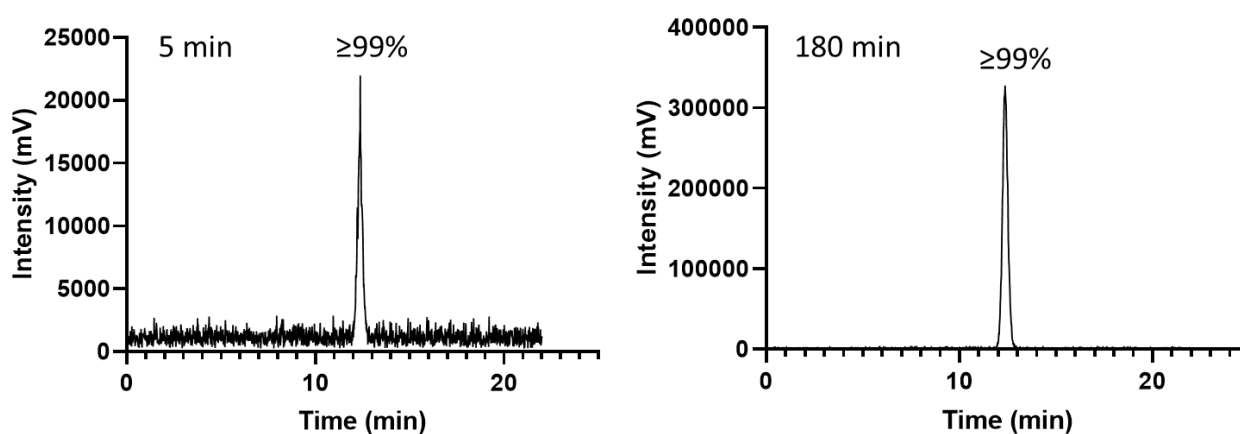

**Figure S16.** Radio-HPLC chromatograms of  $[^{18}\text{F}]\text{SiFA-Tz}$  ( $[^{18}\text{F}]\mathbf{6}$ ) in human plasma stability studies demonstrating no detectable decomposition.



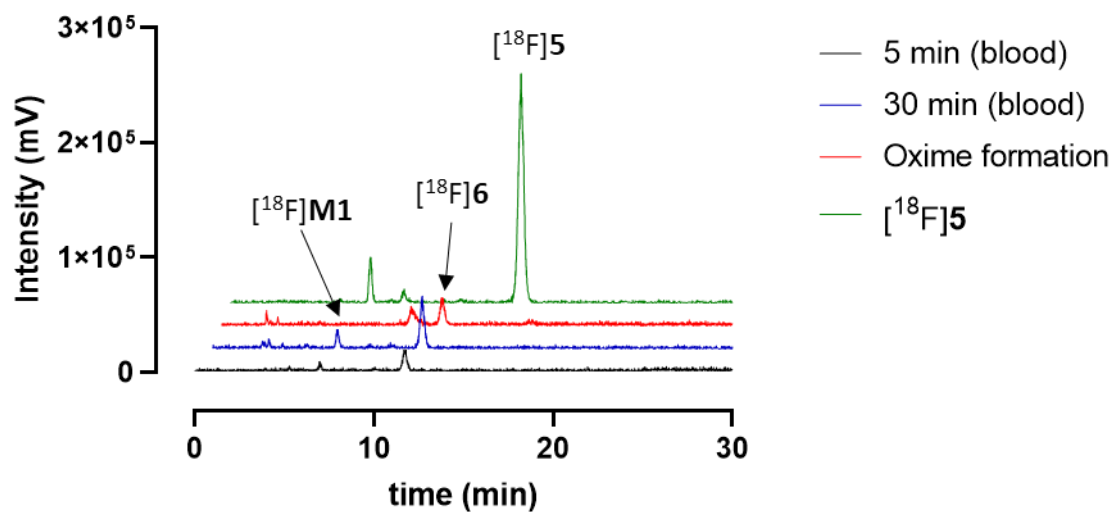

**Figure S17.** Radio-HPLC chromatograms of radiolabeling of  $[^{18}\text{F}]\text{SiFA}$ -aldehyde ( $[^{18}\text{F}]\mathbf{5}$ ), oxime formation producing  $[^{18}\text{F}]\text{SiFA}$ -Tz ( $[^{18}\text{F}]\mathbf{6}$ ) and metabolites ( $t = 5$  min, 30 min) found in mouse blood after intravenous administration of  $[^{18}\text{F}]\text{SiFA}$ -Tz ( $[^{18}\text{F}]\mathbf{6}$ ).
